# Supplementary material
Source: PubMed Central journal article supplement (PMC6642367)
Supplement: bgz100_suppl_supplementary_material.pdf [file bgz100_suppl_supplementary_material.pdf]

## Supplementary Material

**Supplementary Table 1A:** List of qPCR primer sequences

|                         |   | <b>Primer sequence</b>         |
|-------------------------|---|--------------------------------|
| Genomic <i>XNC10 α2</i> | F | 5'-cattagaccactaccagacttg-3'   |
|                         | R | 5'-aggaaggtgcagtttcagtt-3'     |
| Genomic <i>XNC5</i>     | F | 5'-agggtgccattcgtgttat-3'      |
|                         | R | 5'-ctctgtggtctcacctttcttc-3'   |
| <b>qPCR primers</b>     |   |                                |
| <i>GAPDH</i>            | F | 5'-gacatcaaggccgccattaagact-3' |
|                         | R | 5'-agatggaggagtgagtgaccat-3'   |
| <i>XNC1</i>             | F | 5'-catttgaggtgtggcaagg-3'      |
|                         | R | 5'-gcagctcacatgcagatttc-3'     |
| <i>XNC4</i>             | F | 5'-accaaagttgccagggaata-3'     |
|                         | R | 5'-gcagctcacaggcattattg-3'     |
| <i>XNC10</i>            | F | 5'-ctccatgcattcgtcttc-3'       |
|                         | R | 5'-tctcaacaccagtctgttt-3'      |
| <i>XNC11</i>            | F | 5'-cacagatggcaggttctca-3'      |
|                         | R | 5'-tgtagctcacaggcatttctac-3'   |
| <i>Vα6-Jα1.43</i> iTCR  | F | 5'-ggaattgctggttaataattggga-3' |
|                         | R | 5'-aatgtgagttgtggaacccc -3'    |
| <i>Vα22-Jα1.32</i> iTCR | F | 5'-atgtggtggacggacatacag-3'    |
|                         | R | 5'-tggaaccagctccagcattag-3'    |
| <i>Vα23-Jα1.3</i> iTCR  | F | 5'-cgcgataaactcaaaggaagaata-3' |
|                         | R | 5'-cttccatagcctattccagta-3'    |
| <i>Vα40-Jα1.22</i> iTCR | F | 5'-tccagcctaccatggaagaag-3'    |
|                         | R | 5'-catattccatagccaccagta-3'    |
| <i>Vα41-Jα1.40</i> iTCR | F | 5'-cccagcctccaagaaggagtc-3'    |
|                         | R | 5'-ggtaagttattccagcctctgt-3'   |
| <i>Vα45-Jα1.14</i> iTCR | F | 5'-tccgtaagagaaggattccag-3'    |
|                         | R | 5'-ctcccagccactaccagaataag-3'  |
| <i>perforin</i>         | F | 5'-cctgctcacaccgttactt-3'      |
|                         | R | 5'-agaatgtcccagcactcttc-3'     |
| <i>FasL</i>             | F | 5'-ggagaactcacgctgatgaa-3'     |
|                         | R | 5'-ggtaaacagagcaccagata-3'     |
| <i>iNOS</i>             | F | 5'-aaccgtaagccaagaagga-3'      |
|                         | R | 5'-tggttctggcagccacagt-3'      |
| <i>Arg1</i>             | F | 5'-tccaaggacagccaagaag-3'      |
|                         | R | 5'-ctcgaacatcattgccaattc-3'    |

**Supplementary Table 1B: List of primer sequences**

| <b>Construction of XNC10-tRFP-puro homology template</b> |        |                                                    |
|----------------------------------------------------------|--------|----------------------------------------------------|
| XNC10-HAL                                                | F1     | 5'-cgatgactggcttctgtgc-3'                          |
| XNC10-HAL                                                | F2     | 5'-tgcggattggtgggtgaag-3'                          |
| XNC10-HAL                                                | R1     | 5'-ctcgggacctggggtttc-3'                           |
| XNC10-HAL                                                | R2     | 5'-actgggctgtcgggacactg-3'                         |
| nested-XNC10                                             | F      | 5'-gagtatgtgggatcacaatggg-3'                       |
| nested-XNC10                                             | R      | 5'-ggtgcagttcagttgactgatg-3'                       |
| 1a-HAL-HindIII                                           | F      | 5'-atgattacgccaagctttacattcactggcgaatcagagcac-3'   |
| 1b-HAL-HindIII                                           | F      | 5'-atgattacgccaagcttctggactccgtggctccctg-3'        |
| 2-HAL                                                    | R      | 5'-agtcacatccattctttattggcag-3'                    |
| 3-HAR-Nhe                                                | F      | 5'-agaatggatgtgagctagcgacggcagcattcgtggaatgaag-3'  |
| 4a-HAR-XbaI                                              | R      | 5'-gaattgggcctctagacctggggtttccagataacaatctttcc-3' |
| 4b-HAR-XbaI                                              | R      | 5'-gaattgggcctctagatctttcataaattgcatcttctacc-3'    |
| SpeI-EF1a                                                | F      | 5'-actagttgctccggtgcccgctcagtg-3'                  |
| SpeI-SV40                                                | R      | 5'-actagtcacatttgagtcaattccagacatg-3'              |
| sequencing pA                                            |        | 5'-gagtatgtgggatcacaatggg-3'                       |
| sequencing pB                                            |        | 5'-cgcactctagttatgccactgg-3'                       |
| sequencing pC                                            |        | 5'-ggtgcagttcagttgactgatg-3'                       |
| sequencing pD                                            |        | 5'-cgaatttgactattccctagtcg-3'                      |
| XNC10 $\alpha$ 2-tRFP-puro                               | F      | 5'-cccattccacaagacaggata-3'                        |
| XNC10 $\alpha$ 2-tRFP-puro                               | R      | 5'-aggggccataaccgtaaag-3'                          |
| <b>RNAi-mediated XNC10 deficiency</b>                    |        |                                                    |
| BbsI-sgRNA-XNC10 $\alpha$ 2                              | top    | 5'-caccgggatgtgagctgagtgagga-3'                    |
| BbsI-sgRNA-XNC10 $\alpha$ 2                              | bottom | 5'-aaactcctcactcagtcacatccc-3'                     |

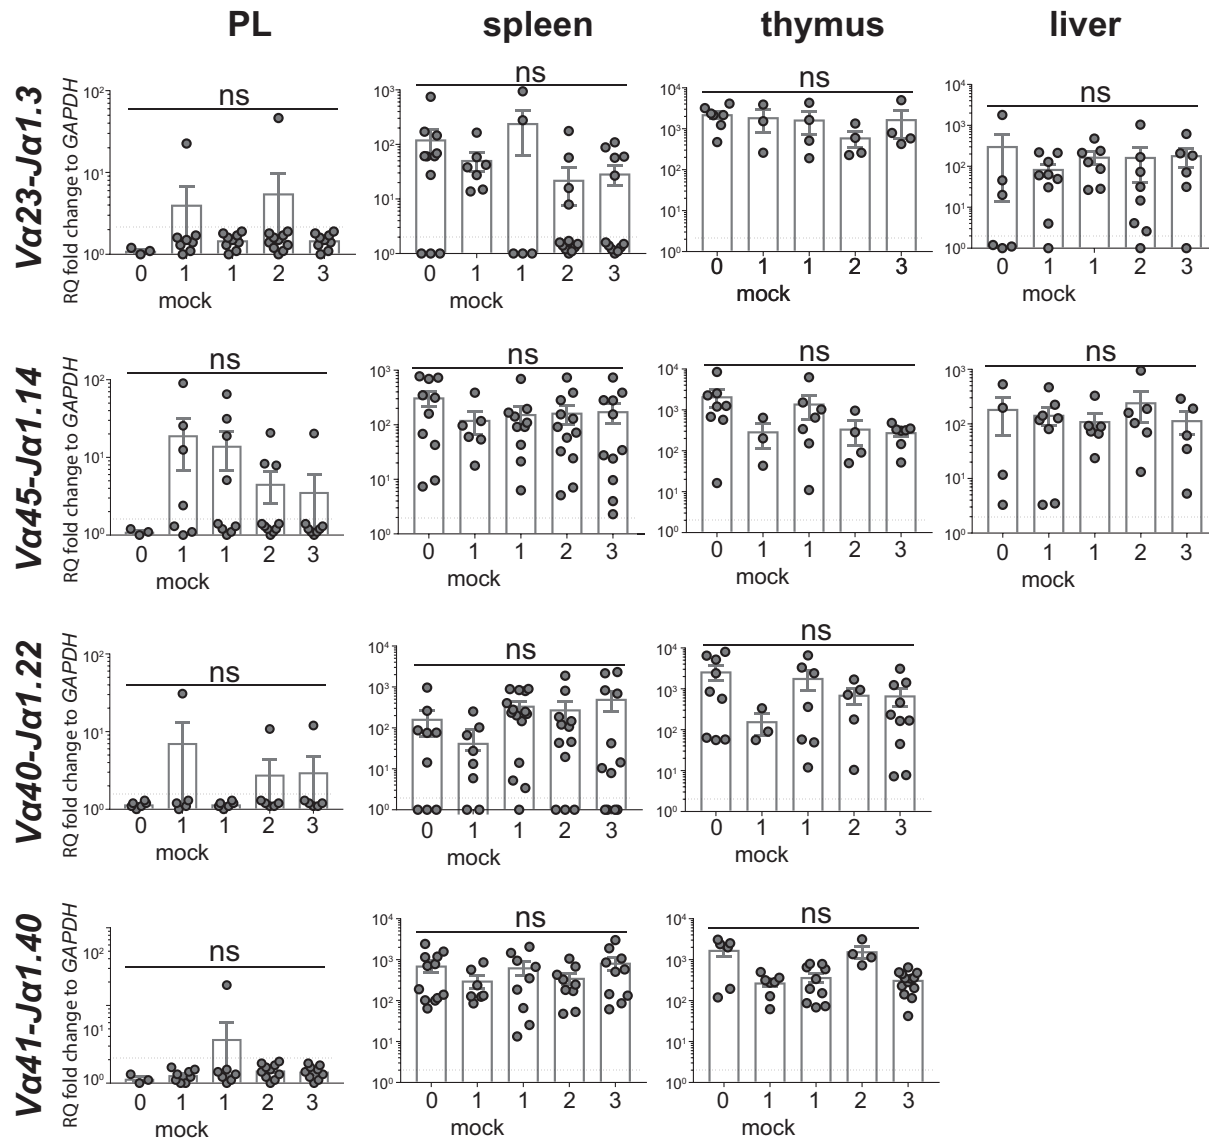

**Supplementary Figure 1.** iTCR rearrangements that are not altered after ff-2 tumor transplantation. Relative expression of four iTCR  $\alpha$  chains: *Va23-Ja1.3*, *Va45-Ja1.14*, *Va40-Ja1.22*, *Va41-Ja1.40* was monitored in the peritoneal cavity, spleen, thymus, and liver after challenge with  $1 \times 10^5$  ff-2 WT tumor cells. Tadpoles at the developmental stage 54-55 were used. Peritoneal lavages, spleen, thymus, and liver were collected from un-, mock- and tumor-challenged tadpoles to assess gene expression by qPCR. Mock challenge was performed by injecting APBS only. Each dot represents one tadpole. Dotted black line indicates the limit of qPCR detection. Gene expression was normalized against endogenous *GAPDH* expression and represented as fold change compared to the lowest level of expression. Results are pooled from three independent experiments and presented as the mean  $\pm$  SEM ( $n = 3 - 15$ ). One-way ANOVA followed by post hoc Tukey's multiple comparisons tests were used to determine significance of differences among groups. ns, no statistical significance among any paired groups.

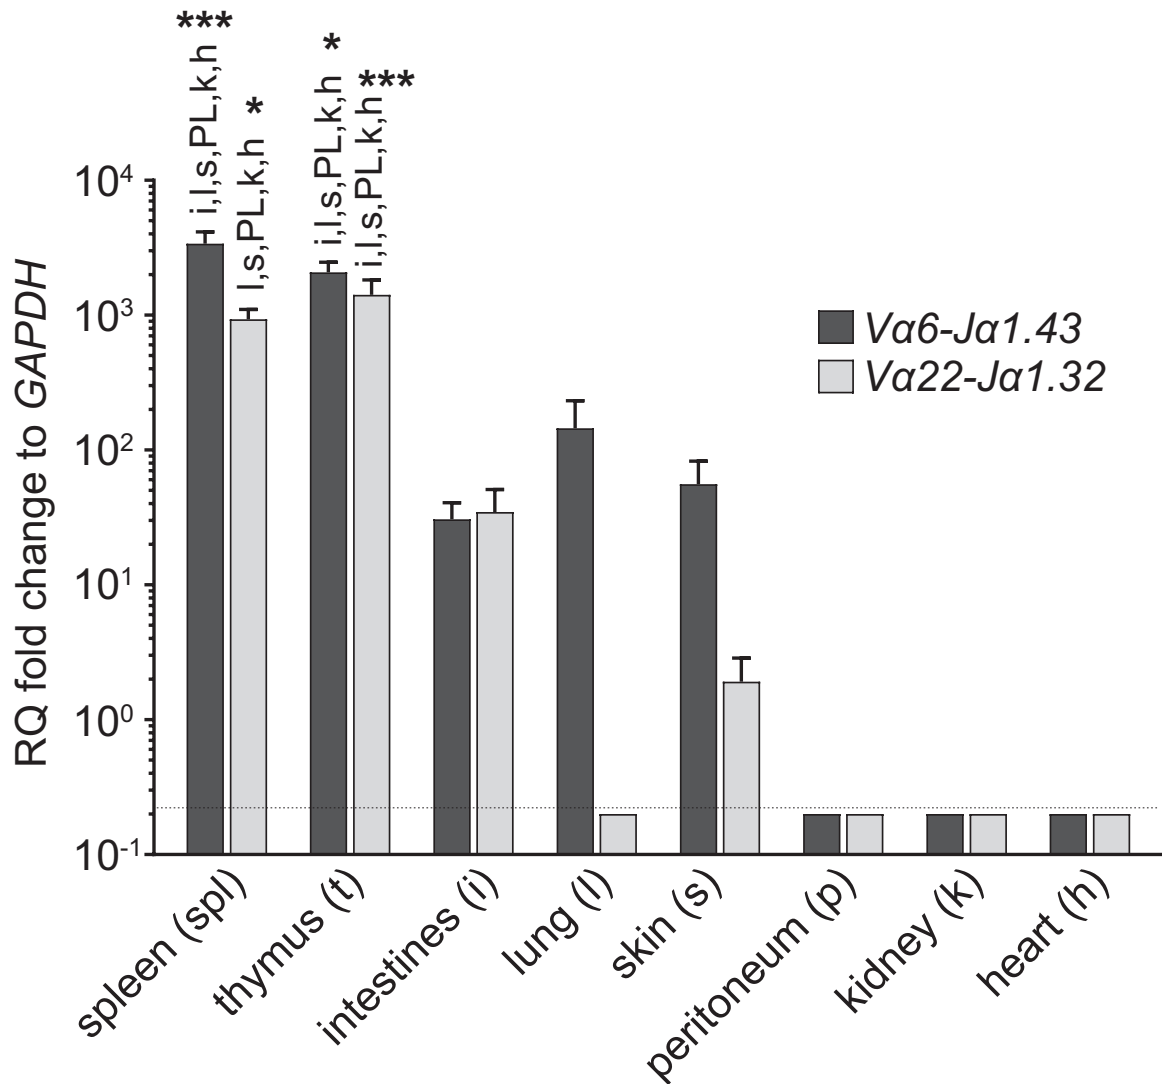

**Supplementary Figure 2.** Relative expression of *Va6-Ja1.43* and *Va22-Ja1.32* iTCR rearrangements in different tissues of unchallenged F tadpoles. Dotted line indicates the qPCR detection limit. Gene expression was normalized against *GAPDH* expression and represented as fold change compared to the lowest level of expression. Results are pooled from three independent experiments and presented as the mean  $\pm$  SEM (n = 6 – 21). One-way ANOVA followed by post hoc Tukey's multiple comparisons tests were used to determine significance of differences among groups and defined as \*  $p < 0.05$ , \*\*\*  $p < 0.0005$ .

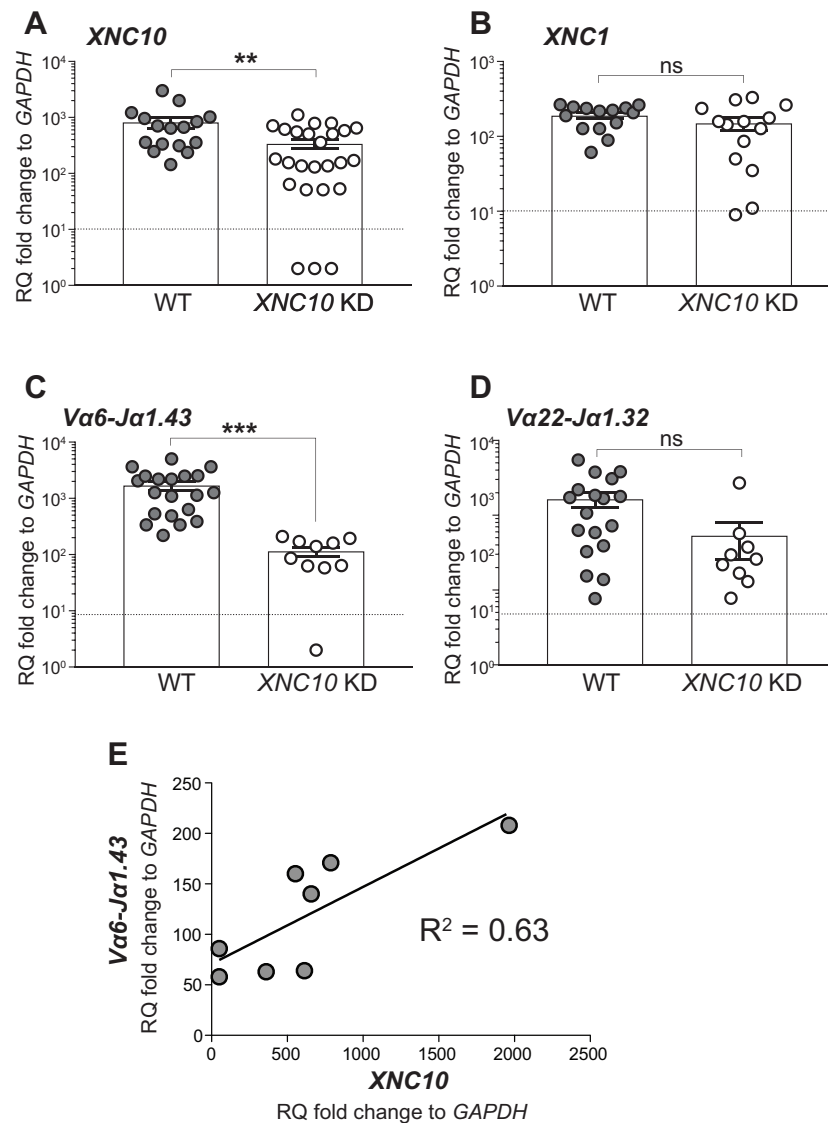

**Supplementary Figure 3.** Unchallenged *XNC10* KD F transgenic tadpoles have deficiency in *XNC10* and *Va6-Ja1.43* iTCR transcript levels. Spleens of *XNC10* deficient (KD) Tg inbred F and WT inbred F control tadpoles at the developmental stage 54-55 were used to assess transcript levels of *XNC10* (A), *XNC1* (B), *Va6-Ja1.43* (C), and *Va22-Ja1.32* (D) by qPCR. (E) Correlation of *XNC10* silencing with reduced *Va6-Ja1.43* gene expression per individual tadpoles, assessed in spleens of unchallenged *XNC10* KD inbred F tadpoles. Gene expression was normalized against *GAPDH* expression and represented as fold change compared to the lowest level of expression. Results were pooled from two independent experiments and presented as the mean  $\pm$  SEM (n = 5 – 15). Two-tailed unpaired t test was used to determine significance of differences between groups and defined as \*\* p < 0.005, \*\*\* p < 0.0005. ns, no statistical significance.

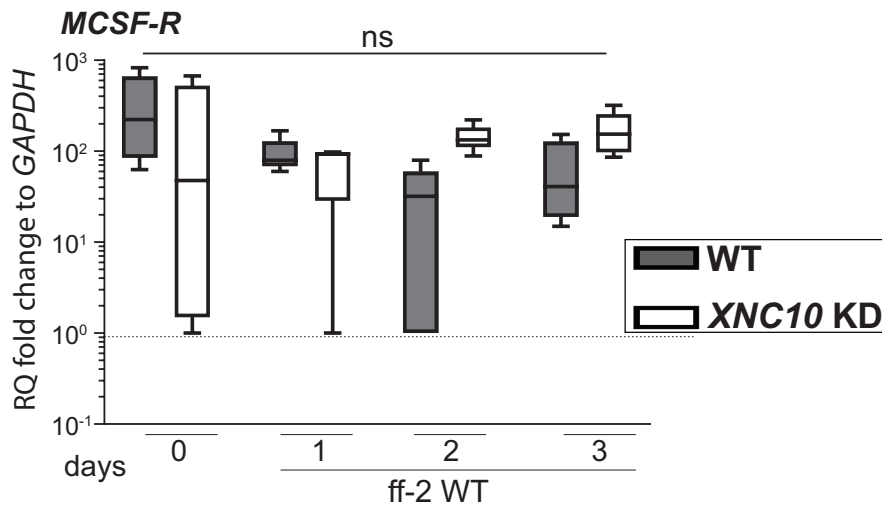

**Supplementary Figure 4.** No differences between WT or *XNC10* KD inbred F hosts in relative abundance of *MSCF-R* transcripts after ff-2 tumor transplantations. WT or *XNC10* KD Tg inbred F tadpoles at the developmental stage 54-55 were ip transplanted with  $1 \times 10^5$  ff-2 WT tumor cells. Following tumor transplantation, peritoneal lavages were collected to assess gene expression by qPCR. Gene expression was normalized against *GAPDH* expression and represented as fold change compared to the lowest level of expression. Results were pooled from three independent experiments and presented as the mean  $\pm$  SEM ( $n = 9 - 20$ ). Two-tailed unpaired t test was used to determine significance of differences between groups. ns, no statistical significance.

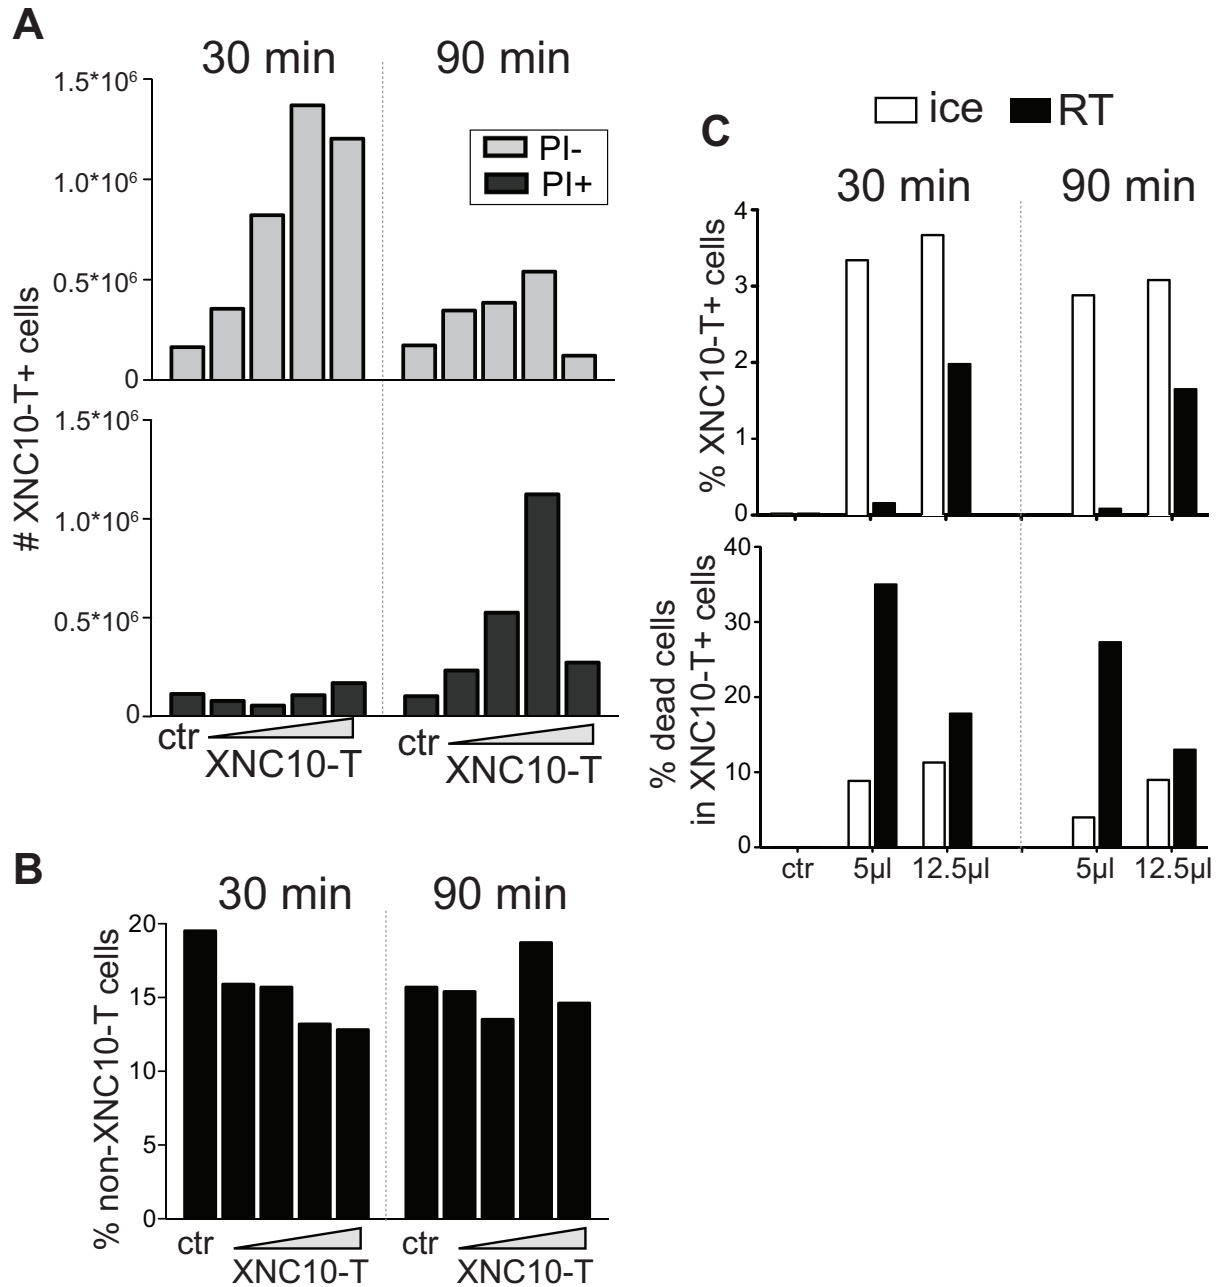

**Supplementary Figure 5.** Effects of XNC10-Tetramer treatment. (A) XNC10-T induced Va6 iT cell death *ex vivo* represented as cell numbers. Freshly isolated splenocytes from an outbred *X. laevis* adult were stained with 4 different concentrations of APC-conjugated XNC10-T (5.0, 7.5, 10.0 and 12.5  $\mu$ g/12.5  $\mu$ l) for 30 min and 90 min. (B) XNC10-T did not affect the viability of cells other than Va6 iT cells *ex vivo*. Freshly isolated splenocytes from an adult outbred *X. laevis* were stained with 4 different concentrations of APC-conjugated XNC10-T (5.0, 7.5, 10.0 and 12.5  $\mu$ g/12.5  $\mu$ l) for 30 min and 90 min. Live/dead cell viability dye – propidium iodide (PI) was used to stain dead cells. (C) Enhanced XNC10-T induced Va6 iT cell death *ex vivo* at room temperature (RT).

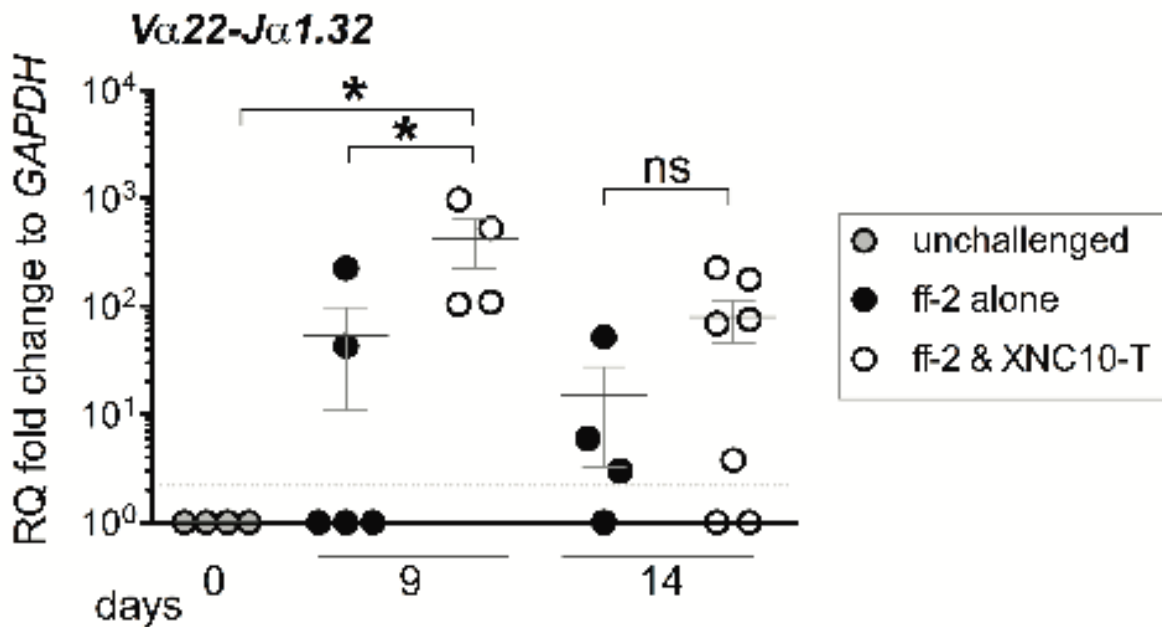

**Supplementary Figure 6.** Changes in *Va22-Ja1.32* iTCR transcript levels following ff-2 tumor transplantation and XNC10-T administration. Tadpoles at the developmental stage 54-55 were used and peritoneal cells were collected for transcriptional analysis. Each dot represents one tadpole. Dotted line indicates the qPCR detection limit. Gene expression was normalized against *GAPDH* expression and represented as fold change compared to the lowest level of expression. Results are presented as the mean  $\pm$  SEM ( $n = 4 - 7$ ). One-way ANOVA followed by post hoc Tukey's multiple comparisons tests were used to determine significance of differences among groups and defined as \*  $p < 0.05$ . ns, no statistical significance.



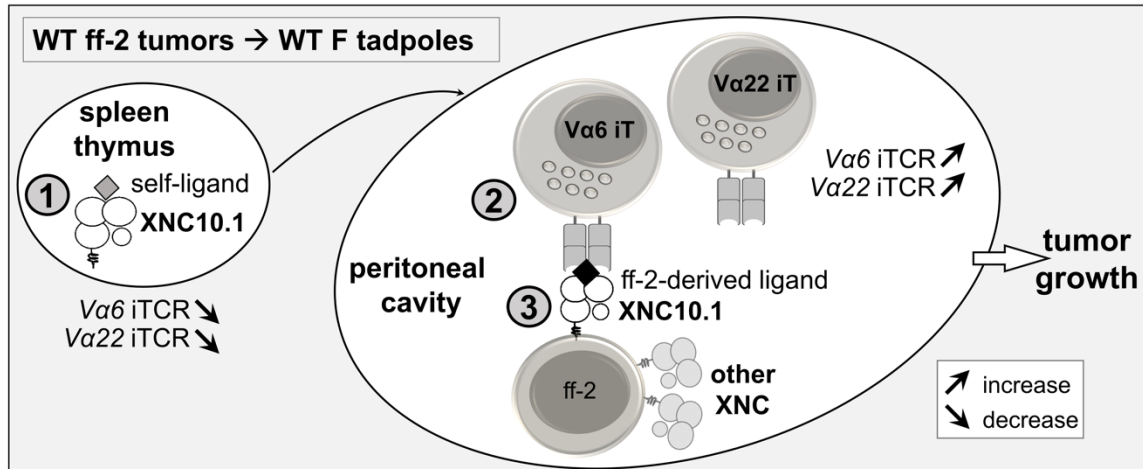

| Target                     | Transplantation                               | Tumor outcome   |
|----------------------------|-----------------------------------------------|-----------------|
| ① KD of host <i>XNC10</i>  | ff-2 WT tumors → <i>XNC10.1</i> KD F tadpoles | no growth       |
| ② Va6-T cell depletion     | ff-2 WT & <i>XNC10.1</i> -T → WT F tadpoles   | enhanced growth |
| ③ KO of tumor <i>XNC10</i> | ff-2 <i>XNC10</i> KO → WT F tadpoles          | tumor rejection |

**Supplementary Figure 7.** Working model of interactions between *Xenopus* ff-2 lymphoid tumor and two different iT cell subsets in the peritoneal cavity of tumor-challenged tadpoles. Upon intraperitoneal tumor transplantation, both Va6 iT and Va22 iT cells infiltrate into the peritoneal cavity. Va6 iT cells either directly or indirectly limit tumor growth. Expression of XNC10 on tumor cells suppresses Va6 iT cell cytotoxicity, promoting tumor growth. The ligand for Va22 iT cells is unknown. By impairing Va6 iT cells or tumor expression of XNC10 genes, tumor growth can be manipulated. Accordingly, *XNC10* deficient ff-2 tumor cells are rejected by WT inbred F tadpoles. Alternatively, blocking Va6 iT cell function with XNC10-tetramer enhances ff-2 WT tumor growth. Surprisingly, F tadpoles with *XNC10* deficiency reject transplanted ff-2 tumors.
